# Supplementary material for: Preclinical evaluation of a precision medicine approach to DNA vaccination in type 1 diabetes
Source: PubMed Central journal article supplement — Proc Natl Acad Sci U S A. 2022 Apr 6;119(15):e2110987119. doi: 10.1073/pnas.2110987119 (PMC9169641; doi:10.1073/pnas.2110987119), 2022-04-06
Supplement: pnas.2110987119.sapp.pdf [file pnas.2110987119.sapp.pdf]

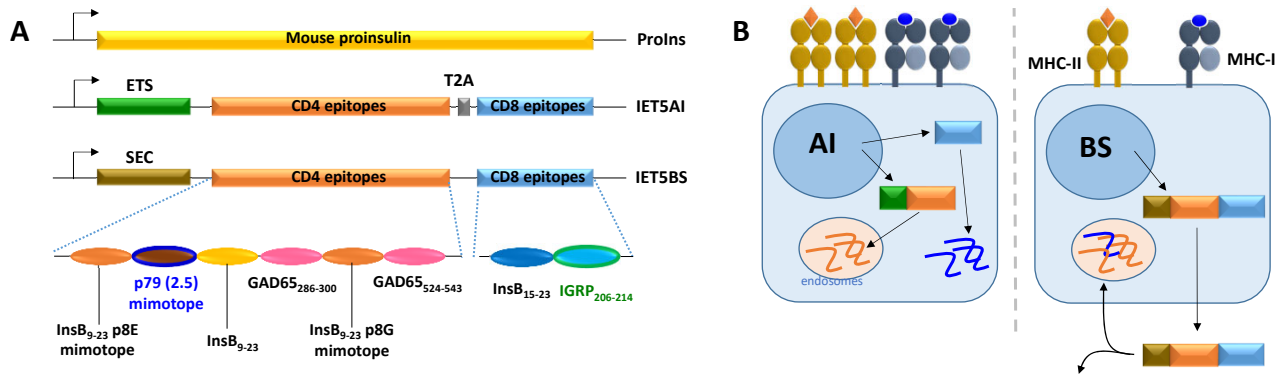

**Figure S1. DNA constructs: arrangement and targeting of epitopes.** (A) Constructs used for expression of mouse proinsulin (ProIns) or tailored epitopes (IET5AI and BS) on pDNA vectors (pBHT568 backbone). The AI variant features the invariant chain's endosomal targeting signal (ETS) Ii<sub>1-80</sub>, preceding native CD4 epitopes (InsB<sub>9-23</sub>; GAD65<sub>286-300</sub>; GAD65<sub>534-543</sub>) and mimotopes (InsB<sub>9-23</sub> R22E [p8E] and E21G/R22E [p8G]; and 2.5mi [p79]), followed by a cleavage site (T2A), separating them from native CD8 epitopes (InsB<sub>15-23</sub>; IGRP<sub>206-214</sub>). The BS variant features the same epitopes and mimotopes as AI but expressed them on a single polypeptide preceded by an albumin secretion signal (SEC). The epitopes recognized by the TCR-tg T cells from BDC2.5 and NY8.3 mice are indicated in blue and green, respectively. (B) Epitopes produced by the AI variant remain intracellular, resulting in maximal antigen loading in the transfected cells, whereas epitopes produced by the BS variant are secreted. The secreted polypeptides may then be taken up by the producing cells and by other cells in the vicinity.

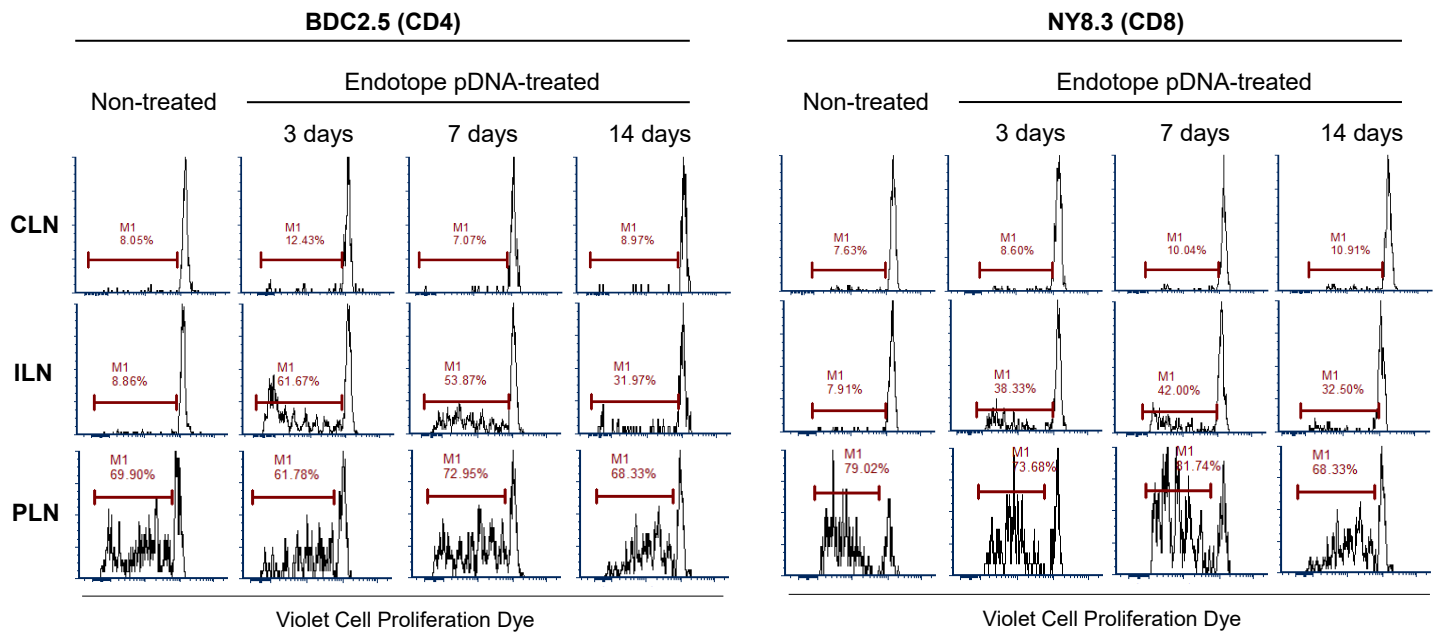

**Figure S2. Persistence of Endotope's epitopes presentation in vivo after pDNA inoculation.**

Representative data from one experiment out of two showing the proliferation (% T cells that have divided at least once) of TCR-tg BDC2.5 CD4<sup>+</sup> and NY8.3 CD8<sup>+</sup> T cells transferred into either non-treated control NOD mice or NOD mice that have been received Endotope pDNA by i.d. injection 3, 7 or 14 days earlier. Proliferation was assessed 3 days after adoptive transfer in inguinal LNs (ILN) draining the inoculation site, cervical LNs (CLN) serving as internal negative control and pancreatic LNs (PLN) serving as positive control.

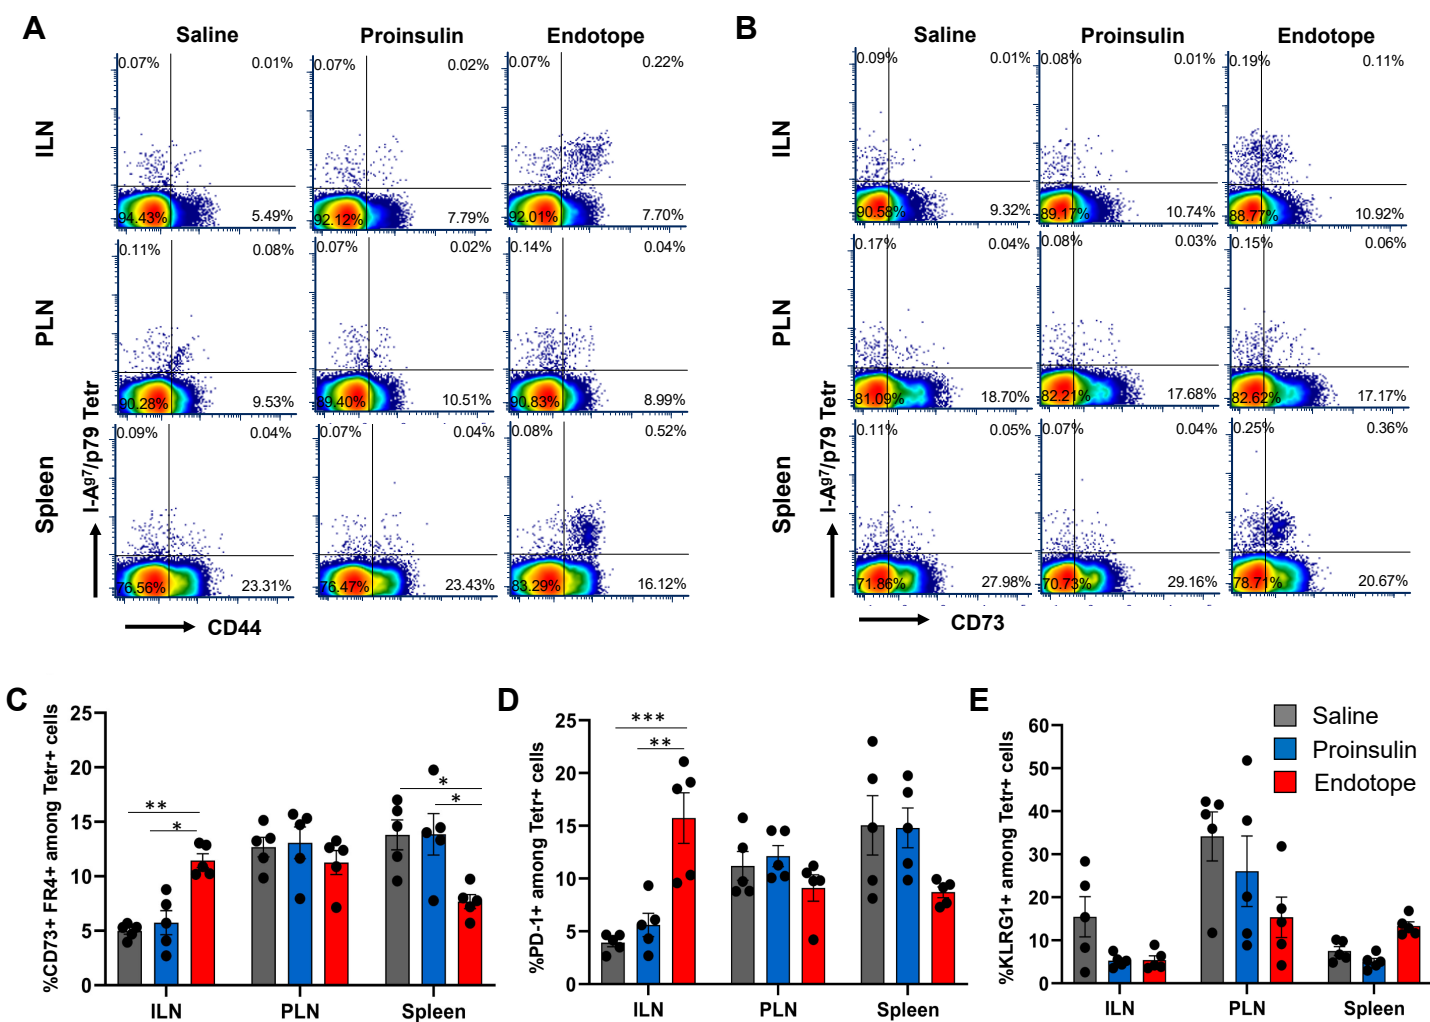

**Figure S3. Effect of Endotope pDNA on the phenotype of epitope-specific CD4+ T cells.** Female NOD mice (n=5 mice per group) were treated i.d. and weekly for 10 weeks. (A,B) Representative dot plots showing expression of CD44 (A) and CD73 (B) on p79-reactive tetramer (Tetr)+ CD4+ T cells from inguinal LN (ILN), pancreatic LN (PLN) and spleen after saline, Proinsulin or Endotope pDNA treatment. (C-E) Percentage (mean  $\pm$  SEM) of CD73+ FR4+ cells (C), PD-1+ cells (D) and KLRG1+ cells (E) among Tetr+ CD4+ T cells.

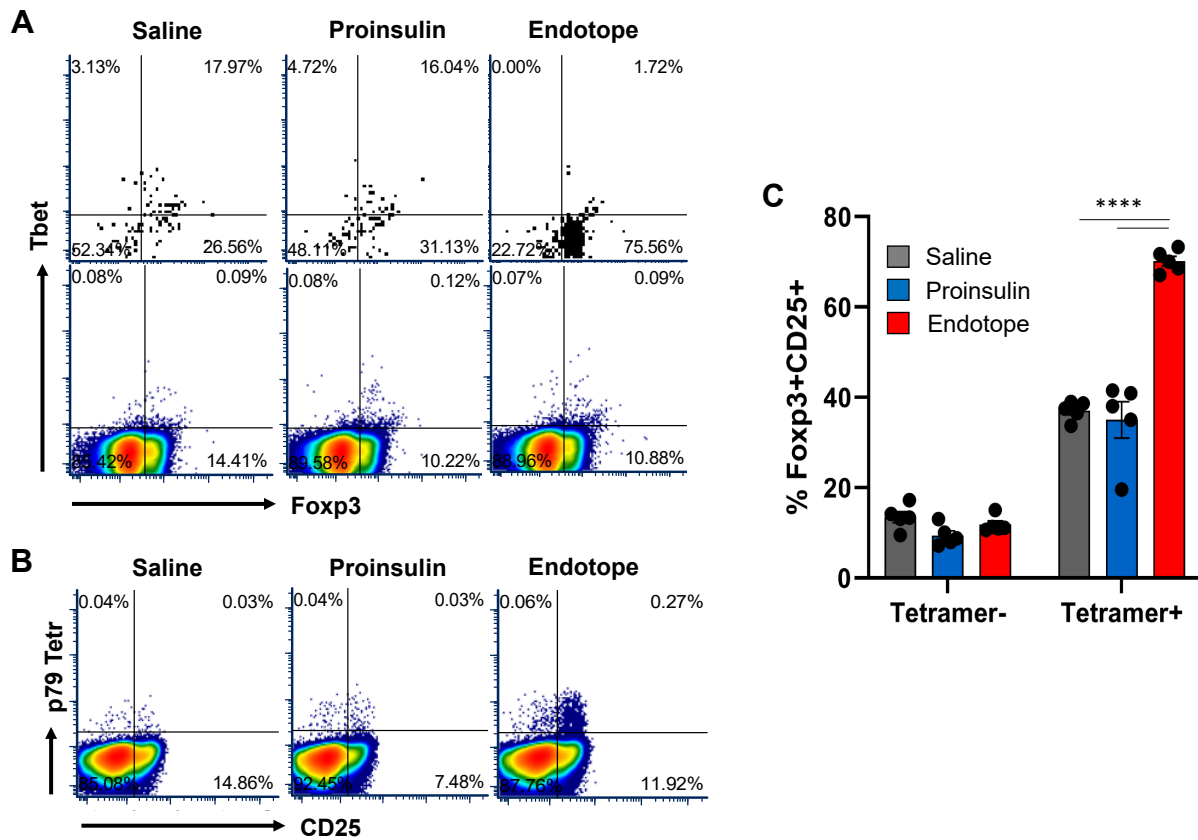

**Figure S4. Effect of Endotope pDNA on the phenotype of epitope-specific CD4<sup>+</sup> T cells.** Female NOD mice (n=5 mice per group) were treated i.d. and weekly for 10 weeks. (A,B) Representative dot plots showing expression of Foxp3 and Tbet in Tetr<sup>+</sup> (top) and Tetr<sup>-</sup> (bottom) CD4<sup>+</sup> T cells (A) and expression of CD25 in Tetr<sup>+</sup> and Tetr<sup>-</sup> cells among total CD4<sup>+</sup> T cells (B). (C) Percentage (mean  $\pm$ SEM) of Foxp3<sup>+</sup> CD25<sup>+</sup> T cells among Tetr<sup>+</sup> and Tetr<sup>-</sup> CD4<sup>+</sup> T cells. Significant differences were determined by two-way ANOVA with Tukey's multiple comparisons.

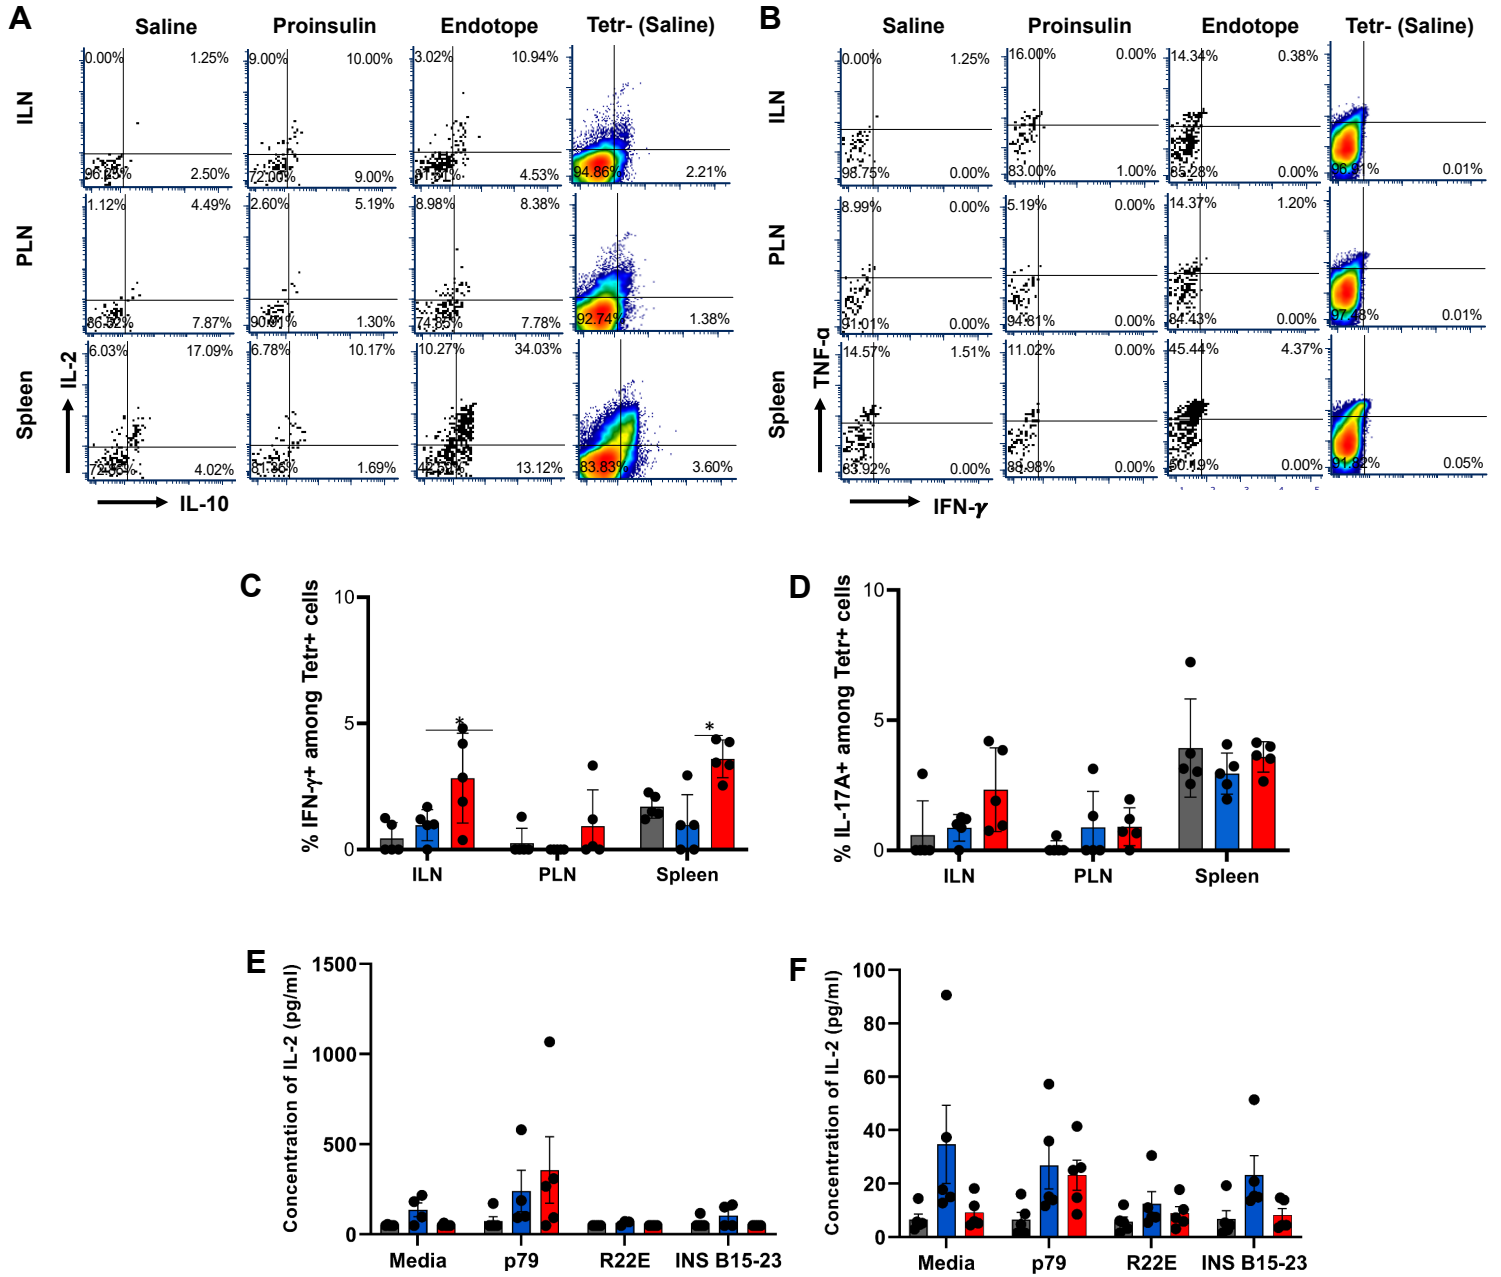

**Figure S5. Effect of Endotope pDNA on the cytokine profile of epitope-specific CD4+ T cells.** Female NOD mice (n=5 mice per group) were treated i.d. and weekly for 10 weeks. (A,B) Representative dot plots showing expression of IL-2 and IL-10 (A) and TNF- $\alpha$  and IFN- $\gamma$  (B) on p79-reactive tetramer (Tetr)+ CD4+ T cells from inguinal LN (ILN), pancreatic LN (PLN) and spleen after saline, Proinsulin or Endotope pDNA treatment, and on Tetr- CD4+ T cells (saline group shown as example). (C,D) Percentage (mean  $\pm$  SEM) of IFN- $\gamma$ + cells (C) and IL-17A+ cells (D) among Tetr+ CD4+ T cells, assessed by intracellular staining. (D,E) Levels (mean  $\pm$  SEM) of IL-2 produced 3 days after restimulation of ILN cells (D) or splenocytes (E) with p79, InsB<sub>9-23</sub> R22E or InsB15-23 peptides. Significant differences were determined by two-way ANOVA with Tukey's multiple comparisons.

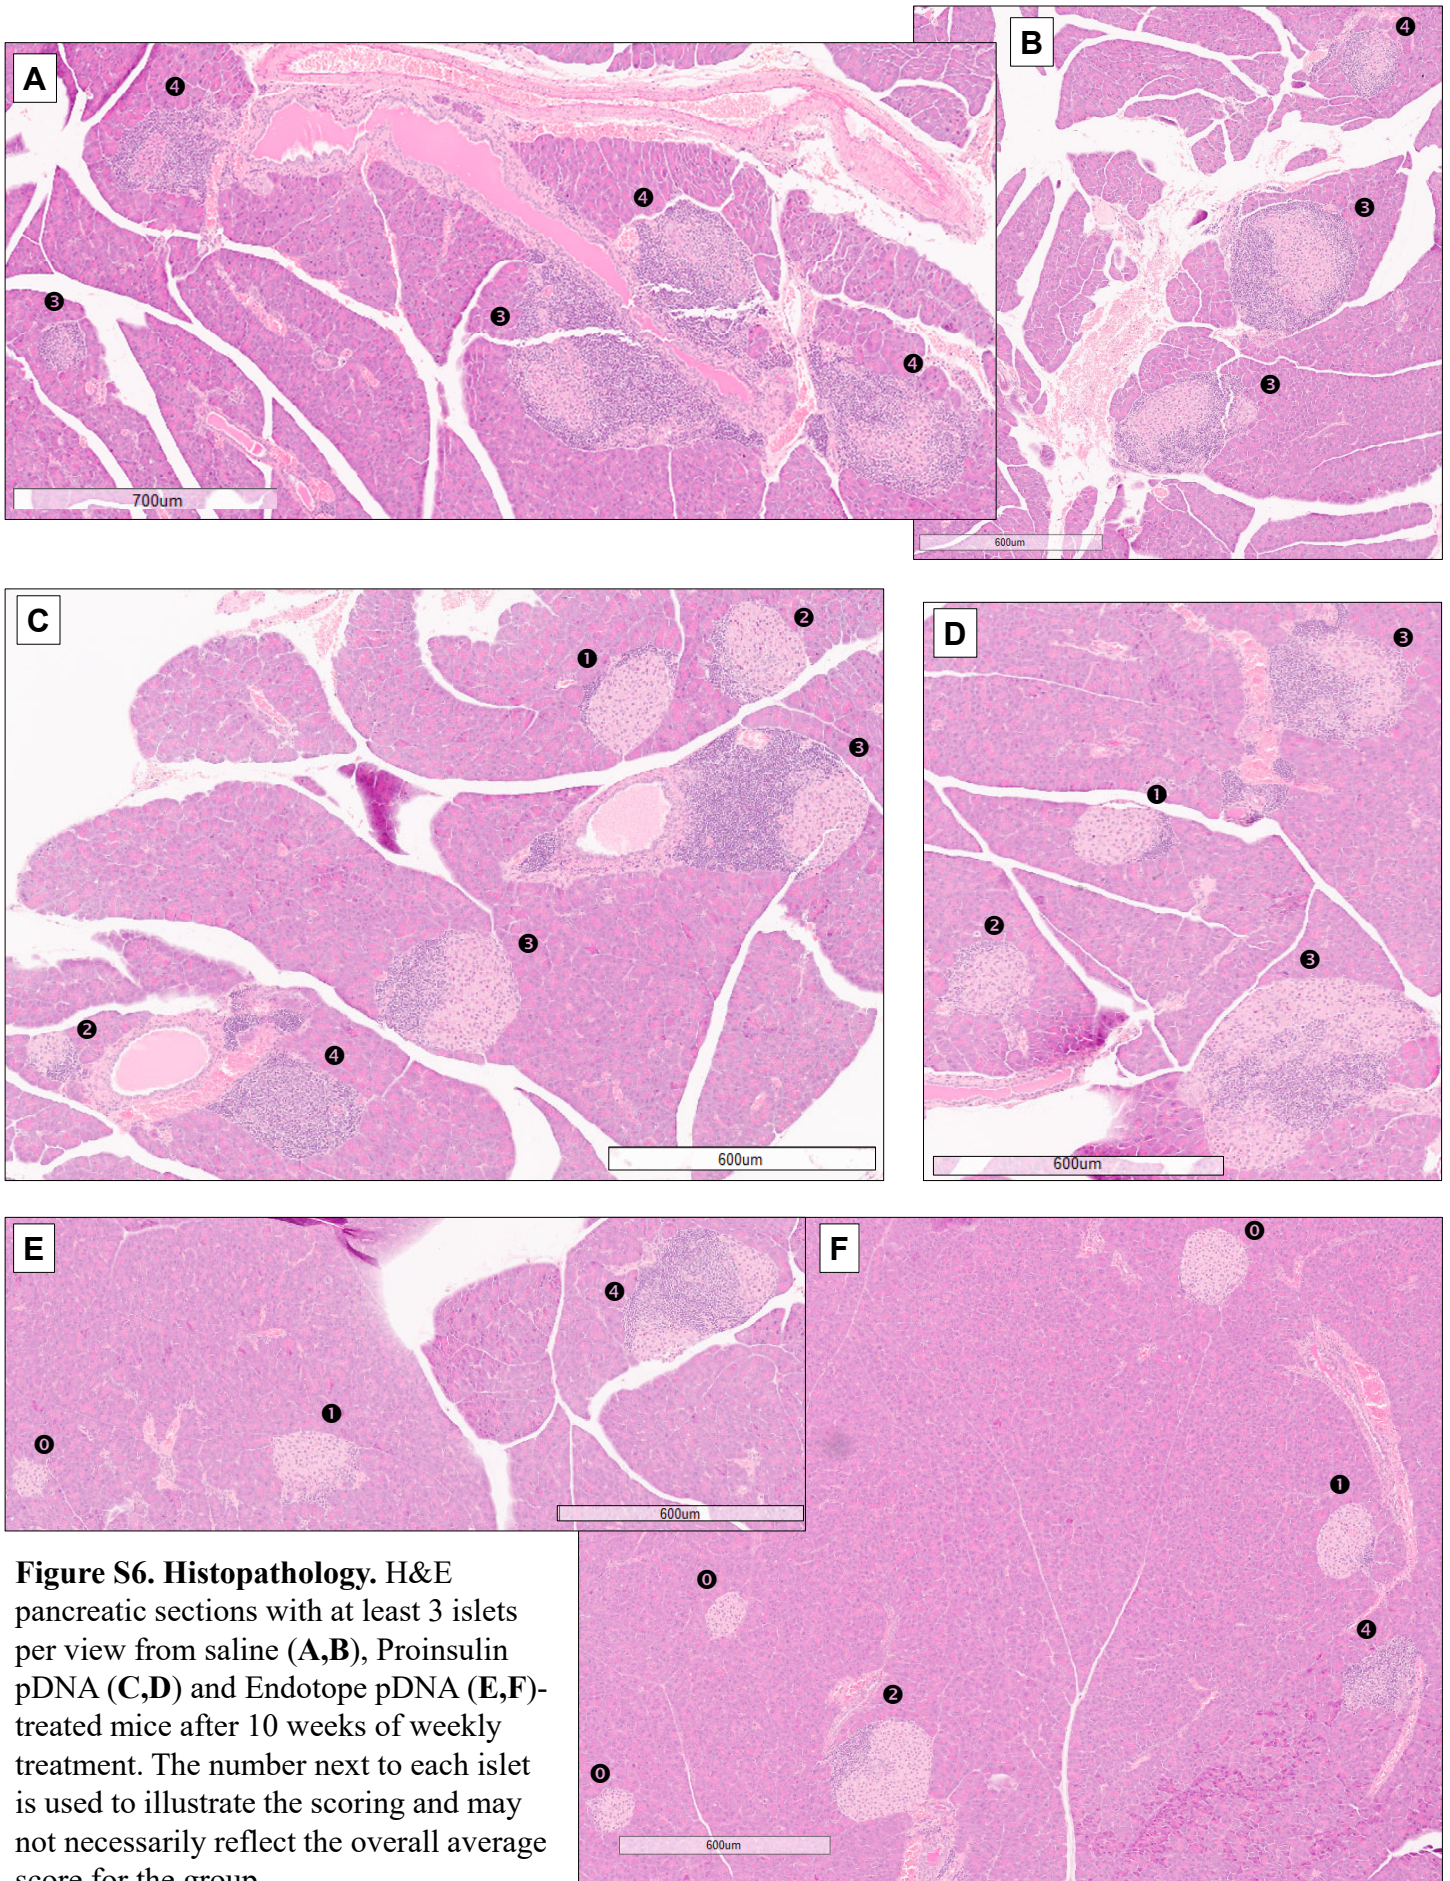

**Figure S6. Histopathology.** H&E pancreatic sections with at least 3 islets per view from saline (**A,B**), Proinsulin pDNA (**C,D**) and Endotope pDNA (**E,F**)-treated mice after 10 weeks of weekly treatment. The number next to each islet is used to illustrate the scoring and may not necessarily reflect the overall average score for the group.

**Table S1. List of antibodies used to characterize T cell responses.** All antibodies are anti-mouse and purchased from Biolegend except Foxp3, TIGIT and T-bet, purchased from eBioscience. The I-A<sup>g7</sup>/p79 tetramer (I-A<sup>g7</sup>/ AAAAVRPLWVRMEAA) was used APC-conjugated at 1:400 dilution.

| Target        | Clone        | Conjugate   | Dilution | RRID        |
|---------------|--------------|-------------|----------|-------------|
| CD4           | GK1.5        | APC Cy7     | 1:400    | AB_312699   |
| CD25 (IL-2Ra) | PC61         | BV605       | 1:400    | AB_2563059  |
| CD44          | IM7          | AF700       | 1:400    | AB_493713   |
| CD73          | TY/11.8      | FITC        | 1:300    | AB_2716076  |
| FR4           | 12A5         | PE          | 1:300    | AB_1134202  |
| CD279 (PD-1)  | RMP1-30      | PE-Cy7      | 1:400    | AB_2637375  |
| TIGIT         | GIGD7        | PE-Cy7      | 1:300    | AB_572017   |
| Foxp3         | FKJ-16s      | BV421       | 1:100    | AB_1518813  |
| T-bet         | O4-46        | PE          | 1:100    | AB_10564071 |
| IFN- $\gamma$ | XMG1.2       | BV785       | 1:100    | AB_2629667  |
| IL-10         | JES5-16E3    | PE-Cy7      | 1:100    | AB_11150582 |
| IL-2          | MQ1-17H12    | PE          | 1:100    | AB_315089   |
| IL-17A        | TC11-18H10.1 | BV605       | 1:100    | AB_536018   |
| TNF- $\alpha$ | MP6-XT22     | PerCP/Cy5.5 | 1:100    | AB_315427   |
| Granzyme B    | QA16A02      | AF700       | 1:100    | AB_2728389  |
